# Supplementary material for: Effect of indium-modified palladium catalysts on the hydrodechlorination of 4-chlorophenol
Source: Royal Society of Chemistry journal article supplement (doi:10.1039/c5ra05957g), 2015-01-01
Supplement: c5ra05957g1.pdf [file c5ra05957g1.pdf]

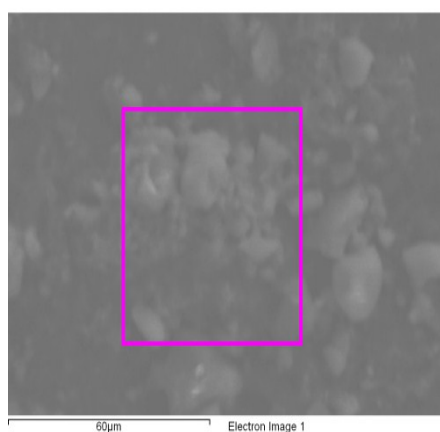

a

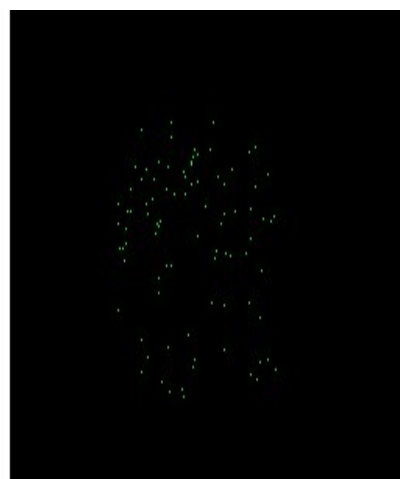

b

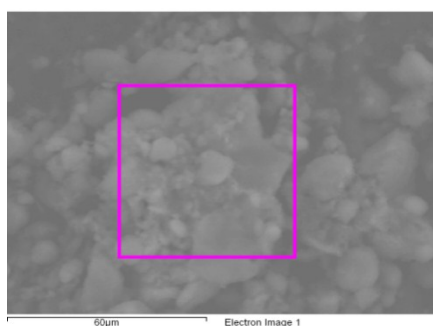

c

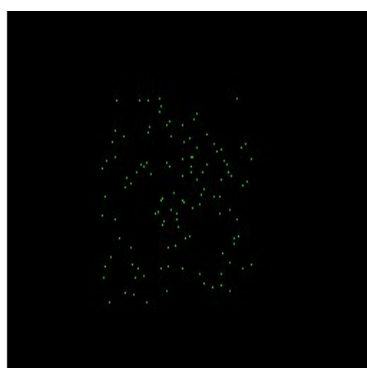

d

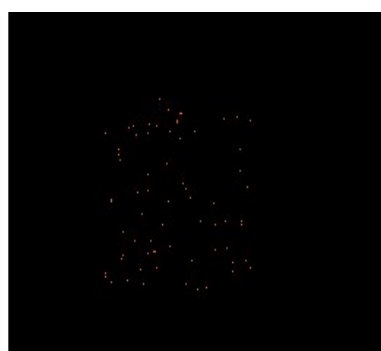

e

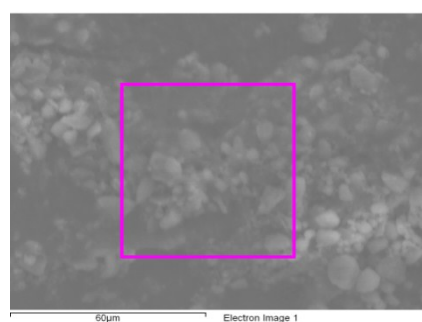

f

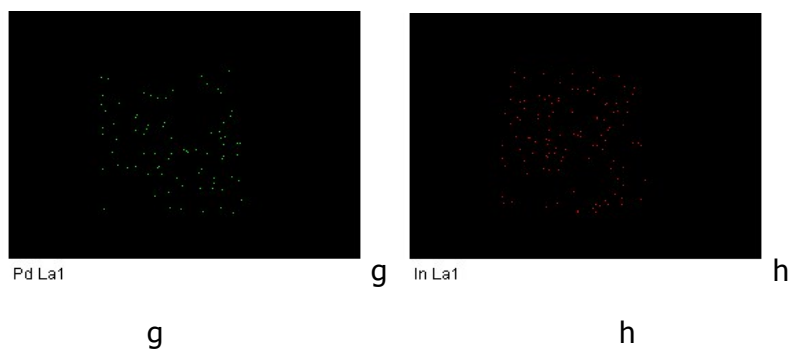

Fig. SEM/EDS images of reduced catalyst 1%Pd , IP-2 and IP-7 (a) 1%Pd , (b) Pd La1 in 1%Pd , (c) IP-2 (In / Pd = 0.1/1) , (d) Pd La1 in IP-2 , (e) In La1 in IP-2 , (f) IP-7 (In / Pd = 3/1) , (g) Pd La1 in IP-7 , (h) In La1 in IP-7 .

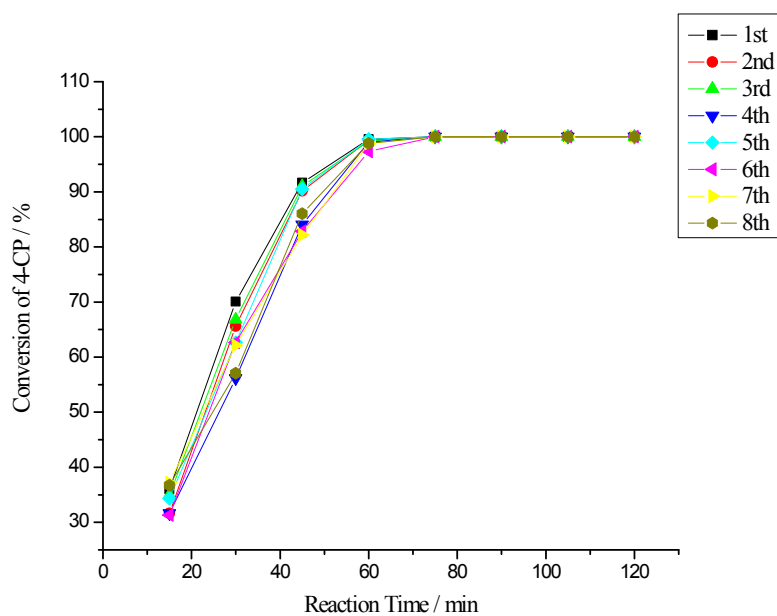

Fig. 9 The influence of reuse times of catalysts on the conversion of 4-CP

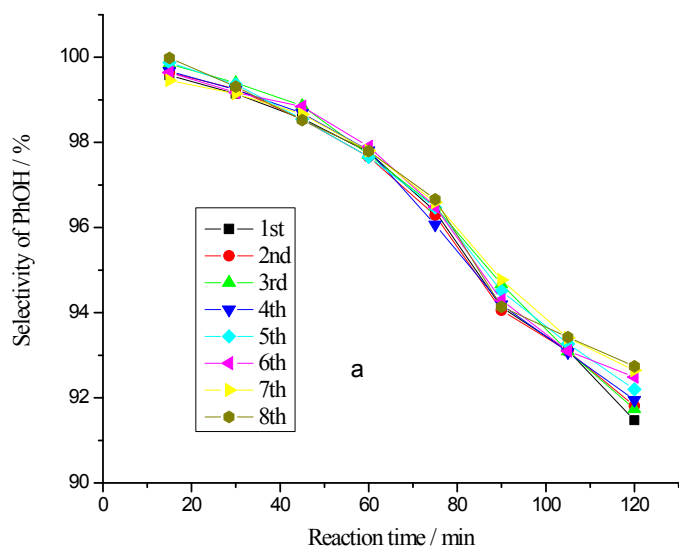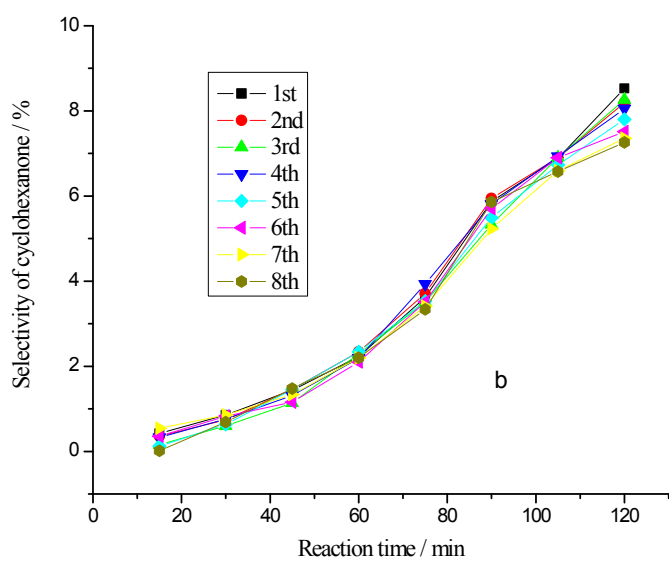

Fig. 10 The influence of reuse times of catalysts on the hydrogenation products
